# Supplementary material
Source: HighWire-hosted journal article supplement (https://bmjopen.bmj.com/content/6/10/e012116)
Supplement: inline-supplementary-material-1 [file inline-supplementary-material-1.pdf]

## Appendices

### Searched Databases:

- Embase: embase 1980 to april 2015 week 15.
- Medline: 1946 to april 2015 week 2.
- Psycinfo: 1806 to April Week 2 2015.
- Web of science searched 22<sup>nd</sup> April 2015.
- Cochrane Database of Systematic Reviews : Issue 4 of 12, April 2015
- Cochrane Central Register of Controlled Trials : Issue 3 of 12, March 2015

### Appendix 1. MEDLINE (Ovid) search strategy:

1. cellular phone/
2. ((cell\* or mobile or wireless) adj (phone\* or telephon\*)).tw.
3. (cellphone\* or mobiles or mhealth or m-health).tw.
4. ((mobile or handheld or hand-held) adj2 (device\* or technolog\* or app\* or health\*)).tw.
5. (smart phone\* or smartphone\* or blackberry or iphone\* or android phone\* or google android or ipod touch or personal digital assistant\* or pda or pdas).tw.
6. 1 or 2 or 3 or 4 or 5
7. (text\* or messag\* or multimedia or multi-media or imag\* or mms or data or input\* or application\* or app?).tw.
8. 6 and 7
9. text messaging/
10. ((text or short or multimedia or multi-media) adj1 messag\*).tw.
11. sms.tw.
12. (texting\* or texted or texter\*).tw.
13. (mms and (multimedia or multi-media or messag\*)).mp.
14. Electronic mail/
15. (electronic adj3 mail\$).ab,ti.
16. (electronic adj3 messag\$).ab,ti.
17. (email\$ or e-mail\$).ab,ti.
18. (noti\* adj6 (patient\* or client\* or service-user\* or people)).ti,ab,kw.
19. ((remind\* or alert\* or return\* or fail\*) adj2 (patient\* or client\* or service-user\* or people)).tw.
20. ((appointment\* or attend\* or arriv\* or consul\*) adj2 (patient\* or client\* or service-user\* or people)).tw.
21. (non?attend or non attend\* or no show).ti,ab,kw.
22. ((appointment\* or attend\*) adj6 (complicance or fail\* or keep\* or miss\* or prompt\*)).ti,ab,kw.
23. exp Reminder Systems/
24. exp "Appointments and Schedules"/
25. exp Patient Compliance/
26. Outpatients/
27. Outpatient Clinics, Hospital/ut [Utilization]
28. Case Management/
29. Office Visits/
30. 8 or 9 or 10 or 11 or 12 or 13 or 14 or 15 or 16 or 17 or 18
31. 19 or 20 or 21 or 22 or 23 or 24 or 25 or 26 or 27 or 28 or 29
32. 30 and 31
33. exp animals/ not humans.sh.
34. 32 not 33
35. limit 34 to yr="1993 -Current"

### Appendix 2. EMBASE (Ovid) search strategy:

1. mobile phone/
2. ((cell\* or mobile or wireless) adj (phone\* or telephon\*)).ti,ab,kw.
3. (cellphone\* or mobiles or mhealth or m-health).ti,ab,kw.
4. ((mobile or handheld or hand-held) adj2 (device\* or technolog\* or app\* or health\*)).ti,ab,kw.
5. personal digital assistant/
6. (smart phone\* or smartphone\* or blackberry or iphone\* or android phone\* or google android or ipod touch or personal digital assistant\* or pda or pdas).ti,ab,kw.
7. 1 or 2 or 3 or 4 or 5 or 6
8. (text\* or messag\* or multimedia or multi-media or imag\* or mms or data or input\* or application\* or app?).ti,ab,kw.
9. 7 and 8
10. text messaging/
11. ((text or short or multimedia or multi-media) adj1 messag\*).ti,ab,kw.
12. sms.ti,ab,kw.
13. (texting\* or texted or texter\*).ti,ab,kw.
14. (mms and (multimedia or multi-media or messag\*)).ti,ab,kw.
15. e-mail/
16. (electronic adj3 mail\$).ti,ab,kw.
17. (electronic adj3 messag\$).ti,ab,kw.
18. (email\$ or e-mail\$).ti,ab,kw.
19. (noti\* adj6 (patient\* or client\* or service-user\* or people)).ti,ab,kw.
20. 9 or 10 or 11 or 12 or 13 or 14 or 15 or 16 or 17 or 18 or 19
21. exp reminder system/
22. hospital management/
23. exp patient compliance/
24. exp outpatient care/
25. ((remind\* or alert\* or return\* or fail\*) adj2 (patient\* or client\* or service-user\* or people)).ti,ab,kw.
26. ((appointment\* or attend\* or arriv\* or consul\*) adj2 (patient\* or client\* or service-user\* or people)).ti,ab,kw.
27. (non?attend or non attend\* or no show).ti,ab,kw.
28. ((appointment\* or attend\*) adj6 (complacance or fail\* or keep\* or miss\* or prompt\*)).ti,ab,kw.
29. 21 or 22 or 23 or 24 or 25 or 26 or 27 or 28
30. 20 and 29

### **Appendix 3. PsycINFO (Ovid) search strategy:**

1. Cellular Phones/
2. ((cell\* or mobile or wireless) adj (phone\* or telephon\*)).ti,ab,id.
3. (cellphone\* or mobiles or mhealth or m-health).ti,ab,id.
4. ((mobile or handheld or hand-held) adj2 (device\* or technolog\* or app\* or health\*)).ti,ab,id.
5. Mobile Devices/
6. (smart phone\* or smartphone\* or blackberry or iphone\* or android phone\* or google android or ipod touch or personal digital assistant\* or pda or pdas).ti,ab,id.
7. 1 or 2 or 3 or 4 or 5 or 6
8. (text\* or messag\* or multimedia or multi-media or imag\* or mms or data or input\* or application\* or app?).ti,ab,id.
9. 7 and 8
10. electronic communication/
11. ((text or short or multimedia or multi-media) adj1 messag\*).ti,ab,id.
12. sms.ti,ab,id.
13. (texting\* or texted or texter\*).ti,ab,id.

14. (mms and (multimedia or multi-media or messag\*)).ti,ab,id.
15. exp computer mediated communication/
16. (electronic adj3 mail\$).ti,ab,id.
17. (electronic adj3 messag\$).ti,ab,id.
18. (email\$ or e-mail\$).ti,ab,id.
19. (noti\* adj6 (patient\* or client\* or service-user\* or people)).ti,ab,id.
20. 9 or 10 or 11 or 12 or 13 or 14 or 15 or 16 or 17 or 18 or 19
21. exp treatment compliance/
22. exp outpatient treatment/
23. treatment dropouts/
24. exp client attitudes/
25. ((remind\* or alert\* or return\* or fail\*) adj2 (patient\* or client\* or service-user\* or people)).ti,ab,id.
26. ((appointment\* or attend\* or arriv\* or consul\*) adj2 (patient\* or client\* or service-user\* or people)).ti,ab,id.
27. (non?attend or non attend\*).ti,ab,id.
28. ((appointment\* or attend\*) adj6 (complicance or fail\* or keep\* or miss\* or prompt\*)).ti,ab,id.
29. 21 or 22 or 23 or 24 or 25 or 26 or 27 or 28
30. 20 and 29

#### **Appendix 4. WEB of Science search strategy:**

1. TS=((cell\* or mobile or wireless) NEAR/1 (phone\* or telephon\*))
2. TS=(cellphone\* or mobiles or mhealth or m-health)
3. TS=((mobile or handheld or hand-held) NEAR/2 (device\* or technolog\* or app\* or health\*))
4. TS=(smart phone\* or smartphone\* or blackberry or iphone\* or android phone\* or google android or ipod touch or personal digital assistant\* or pda or pdas)
5. #4 OR #3 OR #2 OR #1
6. TS=(text\* or messag\* or multimedia or multi-media or imag\* or mms or data or input\* or application\* or app?)
7. #6 AND #5
8. TS=((text or short or multimedia or multi-media) NEAR/1 messag\*)
9. TS=(texting\* or texted or texter\* or sms)
10. TS=(mms and (multimedia or multi-media or messag\*))
11. TS=(electronic NEAR/3 mail\$)
12. TS=(electronic NEAR/3 messag\$)
13. TS=(email\$ or e-mail\$)
14. TS=(noti\* NEAR/6 (patient\* or client\* or service-user\* or people))
15. #14 OR #13 OR #12 OR #11 OR #10 OR #9 OR #8 OR #7
16. TS=((remind\* or alert\* or return\* or fail\*) NEAR/2 (patient\* or client\* or service-user\*))
17. TS=((appointment\* or attend\* or arriv\* or consul\*) NEAR/2 (patient\* or client\* or service-user\*))
18. TS=(non?attend or "non attend\*" or "no show")
19. TS=((appointment\* or attend\*) NEAR/6 (complicance or fail\* or keep\* or miss\* or prompt\*))
20. #19 OR #18 OR #17 OR #16
21. #20 AND #15

#### **Appendix 5. (Cochrane database of systematic reviews) & Cochrane Central Register of Controlled Trials search Strategy:**

1. ((cell\* or mobile or wireless) adj (phone\* or telephon\*))
2. (cellphone\* or mobiles or mhealth or m-health)

3. ((mobile or handheld or hand-held) adj2 (device\* or technolog\* or app\* or health\*))
4. ("smart phone\*" or smartphone\* or blackberry or iphone\* or "android phone\*" or "google android" or ipod touch or "personal digital assistant\*" or pda or pdas)
5. #1 or #2 or #3 or #4
6. (text\* or messag\* or multimedia or multi-media or imag\* or mms or data or input\* or application\* or app?)
7. #5 and #6
8. ((text or short or multimedia or multi-media) adj messag\*)
9. (texting\* or texted or texter\* or sms)
10. (mms and (multimedia or multi-media or messag\*))
11. (electronic adj mail\$)
12. (electronic adj3 messag\$)
13. (email\$ or e-mail\$)
14. (noti\* adj6 (patient\* or client\* or service-user\* or people))
15. #7 or #8 or #9 or #10 or #11 or #12 or #13 or #14
16. ((remind\* or alert\* or return\* or fail\*) adj2 (patient\* or client\* or service-user\* or people))
17. ((appointment\* or attend\* or arriv\* or consul\*) adj2 (patient\* or client\* or service-user\* or people))
18. (non?attend or "non attend\*" or "no show")
19. ((appointment\* or attend\*) adj6 (complicance or fail\* or keep\* or miss\* or prompt\*))
20. #16 or #17 or #18 or #19
21. #15 and #20

## Appendix 6: Cochrane Risk of Bias Summary for individual studies

|                                      | Random<br>Sequence<br>Generation | Allocation<br>Concealment | Blinding of<br>Outcome<br>Assessment | Incomplete<br>Outcome Data | Selective<br>Reporting | Other Bias | At high risk<br>of bias? |
|--------------------------------------|----------------------------------|---------------------------|--------------------------------------|----------------------------|------------------------|------------|--------------------------|
| Arora et al.<br>(2015) (22)          | L                                | L                         | L                                    | L                          | U                      | L          | N                        |
| Bigna et al.<br>(2014) (23)          | L                                | L                         | L                                    | L                          | L                      | U          | N                        |
| Bos et al. (2005)<br>(24)            | H                                | U                         | L                                    | U                          | U                      | H          | Y                        |
| Chen et al.<br>(2008) (25)           | L                                | U                         | L                                    | L                          | U                      | U          | N                        |
| Cho et al (2010)<br>(26)             | L                                | L                         | L                                    | L                          | U                      | L          | N                        |
| Clough & Casey<br>(2014) (27)        | L                                | H                         | L                                    | L                          | U                      | L          | N                        |
| Costa et al<br>(2008) (28)           | U                                | U                         | L                                    | U                          | U                      | U          | Y                        |
| Fairhurst &<br>Sheikh (2008)<br>(29) | L                                | L                         | L                                    | L                          | L                      | H          | N                        |
| Koury & Faris<br>(2005) (30)         | U                                | U                         | U                                    | U                          | U                      | U          | Y                        |
| Leong et al.<br>(2006) (31)          | L                                | H                         | L                                    | L                          | L                      | H          | N                        |
| *Liew et al.<br>(2009) (32)          | L                                | L                         | L                                    | L                          | U                      | H          | N                        |
| Lin et al (2012)<br>(33)             | L                                | L                         | L                                    | L                          | U                      | H          | N                        |
| Narring et al.<br>(2013) (34)        | L                                | U                         | L                                    | L                          | U                      | L          | N                        |
| Odeny et al.<br>(2012) (35)          | L                                | L                         | L                                    | L                          | U                      | L          | N                        |
| Perron et al.<br>(2010) (36)         | L                                | U                         | L                                    | L                          | U                      | L          | N                        |

|                                          |   |   |   |   |   |   |   |
|------------------------------------------|---|---|---|---|---|---|---|
| Prasad & Anand (2012) (37)               | U | U | L | L | U | H | Y |
| Reeve Mates et al (under review)         | L | U | L | L | U | L | N |
| Rutland et al. (2012) (38)               | U | U | U | U | U | U | Y |
| Taylor et al. (2012) (39)                | L | L | L | L | L | L | N |
| Wang et al. (2014) (40)                  | L | L | L | L | U | L | N |
| Youssef, et al. (2014) (17)              | L | L | L | L | L | L | N |
| Included in secondary meta-analysis only |   |   |   |   |   |   |   |
| Fung et al.(2009) (41)                   | U | U | U | U | U | U | Y |
| Nelson et al. (2011)(42)                 | L | U | L | L | U | L | N |
| Norton et al. (2014)(43)                 | L | L | L | U | L | U | N |
| Percac-Lima et al. (2014)(44)            | U | U | U | U | U | U | Y |
| Perron et al. (2013)(45)                 | L | U | U | L | U | U | Y |

Note: Asterisk denotes that the study was included in primary and secondary meta-analyses

Key: L= low risk, H= high risk, U= Unclear risk.

## Appendix 7: Funnel plots

[Figure 4 near here]

[Figure 5 near here]
